# Supplementary material
Source: publisher site journal article supplement (https://www.dovepress.com/article/75918)
Supplement: Supplementary file 1 [file get_supplementary_file.php]

Appendix A-1 Search Strategy-English Keywords Venn diagram

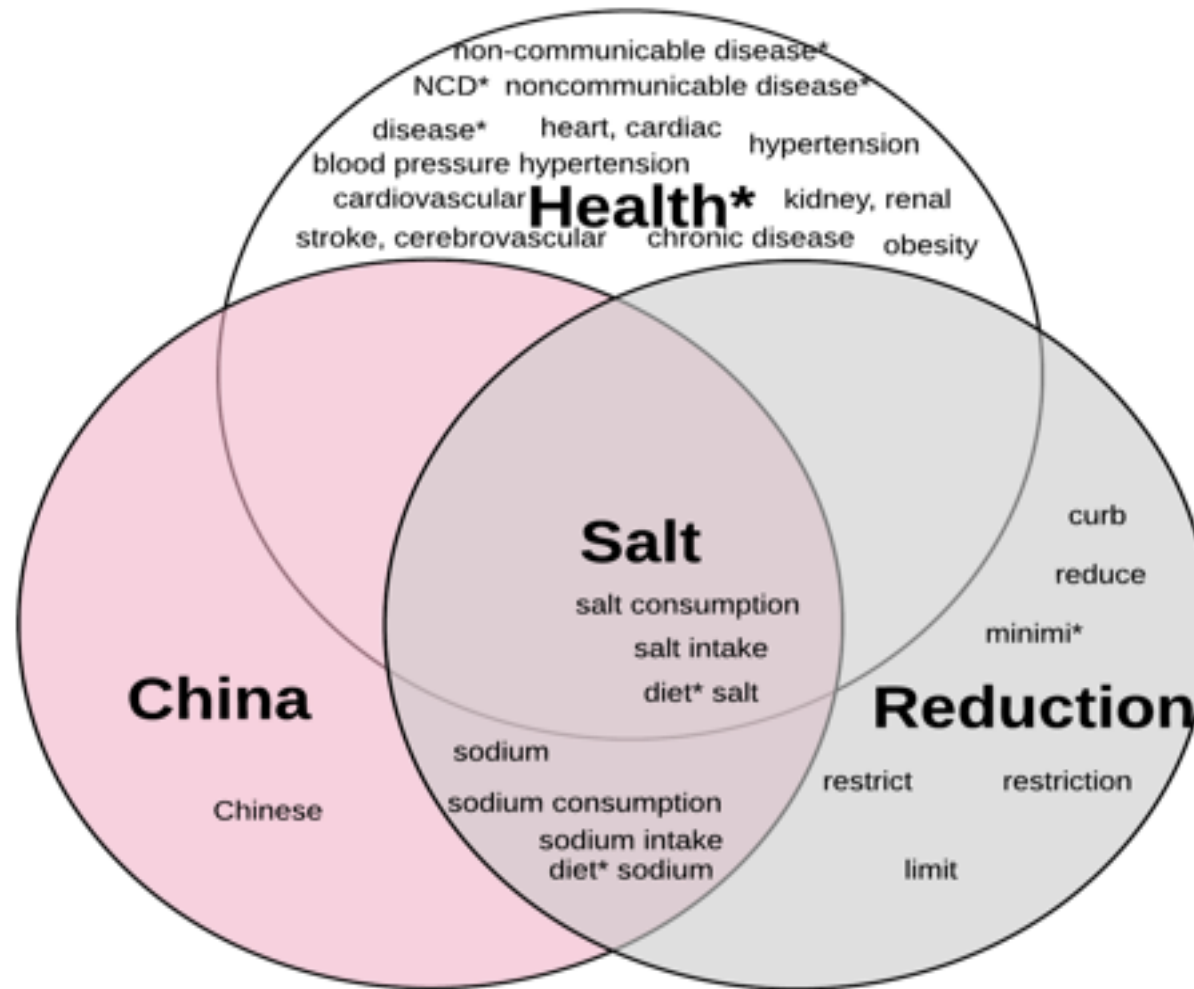

### Appendix A-2 Search Strategy-English Keywords

| <b>Health</b>                           | <b>Salt</b>                     | <b>Reduction</b>                 | <b>China</b>   |
|-----------------------------------------|---------------------------------|----------------------------------|----------------|
| <b>Health*</b>                          | <b>salt intake</b>              | <b>reduce</b>                    | <b>Chinese</b> |
| <b>Disease*</b>                         | <b>salt consumption</b>         | <b>restriction</b>               |                |
| <b>blood pressure<br/>hypertension</b>  | <b>sodium</b>                   | <b>Restrict*</b>                 |                |
| <b>Stroke, cerebrovascular</b>          | <b>Sodium intake</b>            | <b>curb</b>                      |                |
| <b>Heart, cardiac</b>                   | <b>sodium consumption</b>       | <b>limit</b>                     |                |
| <b>kidney, renal</b>                    | <b>diet* salt</b>               | <b>minimi*</b>                   |                |
| <b>cardiovascular</b>                   | <b>diet* sodium</b>             |                                  |                |
| <b>chronic disease</b>                  |                                 |                                  |                |
| <b>NCD* (see also two to the right)</b> | <b>Noncommunicable disease*</b> | <b>Non-communicable disease*</b> |                |

### Appendix A-3 Search Strategy-Chinese Keywords

| 健康           | 盐   | 降低       | 中国  |
|--------------|-----|----------|-----|
| 高血压          | 钠   | 减少       | 中国人 |
| 冠心病          | 消耗  | 控制       | 我国  |
| 心脏病          | 摄入  | 控盐       |     |
| 脑卒中, 中风      | 食用  | 减盐<br>限制 |     |
| 肾脏, 肾病<br>疾病 | 食用盐 | 限盐       |     |
| 慢性病          | 食用钠 |          |     |
| 非传染性疾病       |     |          |     |
|              |     |          |     |
|              |     |          |     |
|              |     |          |     |

## Appendix B: Summary of salt/sodium intake levels in China

| Study site (survey year)                  | First author                       | Sampling                                                                                                                                                                                                     | Age range | Measurement                                                                                             | Sample size                                                                             | Salt intake (Mean ± SD)                                                                                                             |
|-------------------------------------------|------------------------------------|--------------------------------------------------------------------------------------------------------------------------------------------------------------------------------------------------------------|-----------|---------------------------------------------------------------------------------------------------------|-----------------------------------------------------------------------------------------|-------------------------------------------------------------------------------------------------------------------------------------|
| 12 Chinese mainland provinces             | Hipgrave <i>et al</i> <sup>1</sup> | Random sampling (randomly select 1 urban district and 2 rural counties. Further select 2 communities or townships and narrow down 5 neighborhoods or villages, finally 30 households were randomly selected) | 18–45     | Dietary measurement                                                                                     | 6,072                                                                                   | Unweighted intake: 9.0g/day<br>Population-weighted intake: 9.0/day                                                                  |
| China (2008)                              | Ma <i>et al</i> <sup>2</sup>       | Based on the data of 2002 Chinese Nutrition and Health Condition Survey                                                                                                                                      | -         | -                                                                                                       | 45,349                                                                                  | National average: 10.7g/day<br>Countryside: 11.1g/day<br>Urban: 9.7g/day                                                            |
| 9 Chinese mainland provinces (1997, 2009) | Liu <i>et al</i> <sup>3</sup>      | Random sampling (Longitudinal survey)                                                                                                                                                                        | 18~75     | -                                                                                                       | 19,508                                                                                  | 1997: 12.7g/day<br>2009: 8.9g/day                                                                                                   |
| 11 China locations (2002)                 | Liu <i>et al</i> <sup>4</sup>      | Random population samples from 11 locations across China (Urumqi, Altai, Lhasa, Tulufan, Hetian, Guiyang, Guangzhou, Shanghai, Beijing, Shijiazhuang and Taipei).                                            | 45-56     | Single 24-h urine collection                                                                            | 1,135 (572 men<br>563 women)                                                            | Male: 12.0 ± 5.0g/day<br>Female: 10.3 ± 4.9 g/day                                                                                   |
| China (2001)                              | Liu <i>et al</i> <sup>5</sup>      | Random samples of men and women from Han, Uygur, Kazak and Tibetan ethnic populations                                                                                                                        | 45-56     | Single 24-h urine collection                                                                            | Han: 755<br>Uygur: 510<br>Kazaks: 204<br>Tibetans: 125<br>(age 45-56 year)              | Han: 11.3 ± 5.7g/day<br>Uygur: 10.2 ± 7.9g/day<br>Kazaks: 12.5 ± 8.0g/day<br>Tibetans: 14.8 ± 6.7g/day                              |
| Beijing, Shanghai, Guangxi (2003)         | Stamler <i>et al</i> <sup>6</sup>  | Age–sex stratified random sampling                                                                                                                                                                           | 40-59     | Four 24-h dietary recalls and two 24-h urine collections with an average of 3 weeks between collections | Northern men: 276;<br>Northern women: 285;<br>Southern men: 140;<br>Southern women: 138 | Northern men: 17.2 ± 5.4g/day<br>Northern women: 14.6 ± 4.5g/day<br>Southern men: 8.8 ± 3.5g/day<br>Southern women: 7.5 ± 3.1 g/day |
| Guangdong (2014)                          | Li <i>et al</i> . <sup>7</sup>     | Random sampling                                                                                                                                                                                              | -         | 24-h dietary recall for 3 consecutive days and 3-day weighed food record                                | 7,421                                                                                   | 7.6g/day                                                                                                                            |

|                                      |                                    |                                               |                               |                                                                         |                                |                                                                                       |
|--------------------------------------|------------------------------------|-----------------------------------------------|-------------------------------|-------------------------------------------------------------------------|--------------------------------|---------------------------------------------------------------------------------------|
| Beijing, (2015)                      | Zhao <i>et al.</i> <sup>8</sup>    | Random sampling                               | Adults 18-59<br>Children n≤18 | One-week salt estimation method                                         | Adults: 1,981<br>Children: 971 | Adult 15.2±9.1g/day<br>children 11.0±6.2g/day<br>senior citizen 10.2±4.8g/day         |
| Beijing (2012)                       | Zhao <i>et al.</i> <sup>9</sup>    | Multi-stage cluster random sampling           | >18                           | 2-h dietary recall for 3 consecutive days and 3-day weighed food record | 1,841                          | Female: (7.6±5.6) g/day<br>Male: (8.2±5.9) g/day<br>Male higher than female (P<0.05)  |
| Shandong (2014)                      | Bi <i>et al.</i> <sup>10</sup>     | Random sampling                               | 18-69                         | 24-h dietary recall                                                     | 2,208                          | 5.745g/day (sodium)                                                                   |
|                                      |                                    |                                               |                               | 24-h urinary sodium excretion                                           | 2,112                          | 5.398g/day (sodium)                                                                   |
| Shandong (2014)                      | Zhang <i>et al.</i> <sup>11</sup>  | Random sampling                               | 18-69                         | 24-h urinary sodium excretion                                           | 2,184                          | 13.9g/day                                                                             |
| Yantai, Shandong (2014)              | Xu <i>et al.</i> <sup>12</sup>     | Random sampling                               | 18-69                         | 24-h urine survey                                                       | 1,500                          | 11.8g/day                                                                             |
| Laiwu, Shandong (2014)               | Wang <i>et al.</i> <sup>13</sup>   | Random sampling                               | 18~69                         | 72-h dietary recall and weighed food record                             | 83                             | (6.318±2.661) g/day                                                                   |
| Dalian Polytechnic University (2012) | Fan <i>et al.</i> <sup>14</sup>    | Cluster Sampling                              | College students              | 24-h dietary recall for 3 consecutive days                              |                                | 6.66±1.23g/day                                                                        |
| Liaoning (2014)                      | Yu <i>et al.</i> <sup>15</sup>     | Multi-stage stratified random sampling method | -                             | Self-report                                                             | 11,192 families                | (8.96±5.21) g/day<br>Countryside: (10.07±5.67) g/day<br>Urban city: (7.72±4.32) g/day |
| Liaoning (2007)                      | Dong <i>et al.</i> <sup>16</sup>   | Multi-stage stratified cluster sampling       | 35-85                         | -                                                                       | 29,970                         | 15.5±9.5g/day                                                                         |
| Hunan (2015)                         | Yin <i>et al.</i> <sup>17</sup>    | Multi-stage stratified random sampling        | -                             | Dietary recall                                                          | 4,200                          | 10.3g/day                                                                             |
| Hunan (2007)                         | Fu <i>et al.</i> <sup>18</sup>     | Random sampling                               | >2                            | 24-h dietary recall for 3 consecutive days                              | 180 Families                   | 10.1g/d                                                                               |
| Jiangsu (2016)                       | Zhang, <i>et al.</i> <sup>19</sup> | Multi-stage sampling                          | 18-69                         | 24-h urinary sodium excretion                                           | 9,600                          | 11.0±4.1g/day                                                                         |
| Jiangsu (2014)                       | Qin <i>et al.</i> <sup>20</sup>    | Random sampling                               | >18                           | Food frequency questionnaire                                            | 2,502                          | 9.8±6.3g/day                                                                          |
| Jiangsu (2014)                       | Qin <i>et al.</i> <sup>21</sup>    | Random sampling                               | >20                           | 24-h dietary recall and food frequency questionnaire                    | 2,518                          | 11.4±9.6g/day                                                                         |

|                         |                                  |                            |   |                                                                           |                           |                    |
|-------------------------|----------------------------------|----------------------------|---|---------------------------------------------------------------------------|---------------------------|--------------------|
| Zhejiang (2011)         | Chen <i>et al.</i> <sup>22</sup> | Random sampling            | - | 24-h dietary recall for 3 consecutive days and 3-day weighted food record | 4,949                     | 10.5g/day          |
| Sanmen, Zhejiang (2015) | Qi <i>et al.</i> <sup>23</sup>   | Random sampling            | - | Weighted food record                                                      | 200 families, 1652 people | (8.91±33.15) g/day |
| Fujian (2010)           | Hu <i>et al.</i> <sup>24</sup>   | Stratified random sampling | - | Both standard average salt intake and 3-day weighed food record           | 213 families              | 7.63g/day          |

## Appendix C: Summary of Salt Reduction Interventions in China

| Source                                                       | Site                   | Setting | Sample Size   | Target                         | Age               | Period                | Study Design                               | Aim                                                                                          | Intervention                                                   | Result                                                                                                                                                                           |
|--------------------------------------------------------------|------------------------|---------|---------------|--------------------------------|-------------------|-----------------------|--------------------------------------------|----------------------------------------------------------------------------------------------|----------------------------------------------------------------|----------------------------------------------------------------------------------------------------------------------------------------------------------------------------------|
| <b>Salt Substitute</b>                                       |                        |         |               |                                |                   |                       |                                            |                                                                                              |                                                                |                                                                                                                                                                                  |
| China Salt Substitute Collaborative Group 2007 <sup>25</sup> | Northern China         | Rural   | 608           | At-risk population             | 60 years mean     | May 2004-August 2005  | Double-blind randomized controlled trial   | Effect of salt substitute on BP among high risk rural Chinese                                | Provision of salt substitute                                   | Mean SBP is 3.7mmHg <sup>□</sup> lower vs. control. No detectable effects on DBP. Maximum net reduction of 5.4 mmHg achieved at 12 months.                                       |
| Hu et al 2009 <sup>26</sup>                                  | Northern China         | Rural   | 187           | At-risk population             | 58.4 years mean   | May 2004-August 2005  | Double-blind randomized controlled trial   | Impact of salt substitute on BP control                                                      | Introducing salt substitute                                    | Significantly reduced central and peripheral SBP and reduced arterial stiffness                                                                                                  |
| Zhang et al, 2011 <sup>27</sup>                              | Laiwu (Northern China) | Rural   | 411           | Population (Both HBP and NHBP) | 30-60 years old   | 3 months              | Quasi-experiment                           | Impact of salt substitute on BP                                                              | Replacement of salt-substitute for both HBP and NHBP           | Reduction of 7.4 <sup>□</sup> /3.8 mm Hg <sup>□</sup> (SBP/DBP) in the HBP group. Reduction of 1.2 <sup>□</sup> /1.0 <sup>□</sup> mmHg <sup>□</sup> (SBP/DBP) in the NHBP group. |
| Li et al, 2013 <sup>28,29</sup>                              | 5 northern provinces   | Rural   | 120 townships | Population                     | No data available | 2011-2012 (18 months) | Cluster-randomized trial                   | Effect of salt substitute and health education on BP, 24 HRUP, 24HRUS, and proportion of HTN | Health education and making salt substitute easily accessible. | Reduced daily sodium intake and increased daily potassium intake were found in intervention group.                                                                               |
| Zhou et al, 2013 <sup>30</sup>                               | Northern China         | Rural   | 372           | Population (Both HTN and NHTN) | No data           | 2 years               | Double-blinded randomized controlled trial | Effect of salt substitute among HTN and NHTN rural Chinese                                   | Impact of salt substitute on BP                                | Reduction in SBP of 4 mmHg <sup>□</sup> in HTN and lowers both SBP (2 mmHg <sup>□</sup> ) and DBP (2mmHg <sup>□</sup> ) in NHTN controls                                         |

|                                                      |           |       |              |                                            |                   |                |                                             |                                                                                                            |                                                                                            |                                                                                                                                                                                                                                                               |
|------------------------------------------------------|-----------|-------|--------------|--------------------------------------------|-------------------|----------------|---------------------------------------------|------------------------------------------------------------------------------------------------------------|--------------------------------------------------------------------------------------------|---------------------------------------------------------------------------------------------------------------------------------------------------------------------------------------------------------------------------------------------------------------|
| Zhao et al, 2014 <sup>31</sup>                       | Tibet     | Rural | 282          | Population with hypertension (SBP>140mmHg) | 40 or older       | Feb-May 2009   | Patient-blinded randomized controlled trial | Effect of salt-substitute on BP among Tibetans living at high altitude (4300 meters and above)             | Introducing salt substitute to intervention group, control group use regular salt          | Reduction in SBP/DBP in the intervention group in comparison to the control group was -8.2/-3.4 mmHg (PP) and -7.6/-3.5 mmHg (ITC). After intervention, 19.2% of patients in intervention group have their BP under control compared to 8.8% in control group |
| Jardine et al, 2014 <sup>32</sup>                    | China     | Rural | 1903         | Population                                 | Older individuals | 18 months      | Cluster randomized trial                    | The impact of dietary salt reduction on albuminuria                                                        | Education and access to low-sodium salt substitute                                         | Mean follow-up urinary albumin: creatinine ratio (UACR) was 0.19 mg/mmol lower vs. control with a corresponding OR for albuminuria at 0.67 (0.46-0.99).                                                                                                       |
| Zhou et al, 2016 <sup>33</sup>                       | Northern  | Rural | 200 families | Population                                 | No data           | 3 years        | Randomized controlled trial                 | Effect of salt substitute on BP                                                                            | Introducing salt substitute                                                                | Salt substitute significantly reduced the increase in both SBP and DBP vs. control.                                                                                                                                                                           |
| China Salt Substitute and Stroke Study <sup>34</sup> | China     | Rural | 20,000       | Population                                 | No data           | 5 years        | Cluster randomized controlled trial         | Effect of salt reduction on the risk of stroke                                                             | Introducing salt substitute                                                                | Expected completion in 2019                                                                                                                                                                                                                                   |
| <b>Salt Substitute -Taste and acceptability</b>      |           |       |              |                                            |                   |                |                                             |                                                                                                            |                                                                                            |                                                                                                                                                                                                                                                               |
| Lai, Yue & Wu, 2010 <sup>35</sup>                    | Beijing   | Urban | 24           | Population                                 | Not available     | No data        | No data                                     | To test the taste and acceptability of salt substitute (68.84% NaCl, 26.05% KCl, 4.81% MgSO <sub>4</sub> ) | Using extensive triangle test to test difference between ordinary salt and salt substitute | No significant differences of overall likeness between ordinary salt and salt substitute samples.                                                                                                                                                             |
| Chau et al, 2016 <sup>36</sup>                       | Hong Kong | Urban | 169          | Population (Both HTN                       | No data           | June to August | Cross-sectional                             | Compare the preference of                                                                                  | N/A                                                                                        | Older HTN people are more willing to                                                                                                                                                                                                                          |



|                                |                             |            |            |            |               |                      |                                                   |                                                                                                                                                                             |                                                                               |                                                                                                                                                                                                                                              |
|--------------------------------|-----------------------------|------------|------------|------------|---------------|----------------------|---------------------------------------------------|-----------------------------------------------------------------------------------------------------------------------------------------------------------------------------|-------------------------------------------------------------------------------|----------------------------------------------------------------------------------------------------------------------------------------------------------------------------------------------------------------------------------------------|
|                                |                             |            |            | and NHTN)  |               | 2014                 | survey                                            | food saltiness and the willingness to consume low-sodium food                                                                                                               |                                                                               | consume low sodium food <sup>□</sup> No evidence that older people were less sensitive to tasting saltiness.                                                                                                                                 |
| Li et al, 2009 <sup>37</sup>   | 5 Northern areas            | Rural      | 608        |            | 60 years mean | May 2004-August 2005 | Large-scale, blinded, randomized controlled trial | To assess the saltiness, flavor and acceptability of food cooked with salt substitute                                                                                       | Food with different saltiness were distributed to participants for evaluation | Possible small differences (1.8mm) <sup>□</sup> in the flavor of salt substitute did not importantly deter the use of the salt substitute in this study group.                                                                               |
| <b>Salt-restriction tools</b>  |                             |            |            |            |               |                      |                                                   |                                                                                                                                                                             |                                                                               |                                                                                                                                                                                                                                              |
| Mei et al, 2010 <sup>38</sup>  | Shanghai (Minhang District) | Rural      | 371        | Population | 15-69         | 2008-2009            | Intervention Trial                                | Intervention effectiveness of dispatching salt-control spoons                                                                                                               | Dispatchment of salt-control spoons with education materials                  | Increased awareness on salt-control knowledge and salt-control measurement                                                                                                                                                                   |
| Cai et al, 2011 <sup>39</sup>  | Shanghai (Baoshan District) | Rural      | Around 300 | Population | 15-69         | 2008-2009            | Intervention Trial                                | To evaluate the impact of salt-control spoons on KABP and salt intake                                                                                                       | Dispatchment of salt-control spoons                                           | Increase in salt-related health awareness by 20.7% <sup>□</sup> Positive effect on KABP but not on salt intake.                                                                                                                              |
| Yang et al, 2013 <sup>40</sup> | Beijing (Shunyi District)   | Rural      | 403        | Population | 15-79         | 2012 (6 month)       | Randomized controlled trial                       | Impact of salt-restriction tools along with health education                                                                                                                | Provision of salt-restriction tools and health education                      | 41.2% <sup>□□</sup> more use salt-restriction tools pre vs post. 34.8% more use such tools v.s control.                                                                                                                                      |
| Chen et al, 2013 <sup>41</sup> | Beijing                     | Rural area | 403        | Population | 15-79         | 2012                 | A community intervention study                    | To evaluate the effect of an improved salt-restriction spoon on the attitude of salt-restriction, the using rate of salt-restriction-spoon, the actual salt intake, and 24- | Provision of salt-restriction spoons                                          | The daily salt intake decreased by 1.42 g in the intervention group and by 0.28 g in the control group, and repeated measures analysis of variance showed significant change over time (F = 7.044 <sup>□□</sup> ) and significant difference |

|                                |          |                                        |                                  |            |         |           |                           |                                                                                                                                     |                                                                                     |                                                                                                                                                                                                                                 |
|--------------------------------|----------|----------------------------------------|----------------------------------|------------|---------|-----------|---------------------------|-------------------------------------------------------------------------------------------------------------------------------------|-------------------------------------------------------------------------------------|---------------------------------------------------------------------------------------------------------------------------------------------------------------------------------------------------------------------------------|
|                                |          |                                        |                                  |            |         |           |                           | hour urinary sodium excretion (24HUNa).                                                                                             |                                                                                     | between groups by time (F = 2.589□)                                                                                                                                                                                             |
| Wang et al, 2015 <sup>42</sup> | Shanghai | Urban, urban-rural fringe & Rural area | 6866 individuals (2960 families) | Population | 15-69   | 2008-2009 | Multi-stage cluster trial | To evaluate the impact of salt-control spoons on the salt intake of Shanghai residents.                                             | Provision of salt-control spoons                                                    | 41.15% of families still use the salt-control spoons in the 12 <sup>th</sup> month although the percentage decreased over time. 45.69% of the subjects have a daily salt intake of 6g or less, up from 37.24% at baseline.      |
| Wang et al, 2015 <sup>43</sup> | Shanghai | Urban, urban-rural fringe & Rural area | 6748 individuals (2941 families) | Population | 15-69   | 2008-2009 | Multi-stage cluster trial | To assess the impact of salt control spoons to improve knowledge and behavior on restricted salt usage among residents in Shanghai. | Provision of salt-control spoons                                                    | 79.32% of residents have salt-restriction related knowledge in the 12 <sup>th</sup> month, compared to 39.52% at baseline. TV and popular science articles are the preferred way for the mass to obtain salt related knowledge. |
| <b>Health Education</b>        |          |                                        |                                  |            |         |           |                           |                                                                                                                                     |                                                                                     |                                                                                                                                                                                                                                 |
| Chen et al 2008 <sup>44</sup>  | Beijing  | Urban                                  | 110,000                          | Population | No data | 1987-1995 | Intervention Trial        | Impact of worksite intervention on salt intake & other CVD risk factors                                                             | Worksite screening Health education including reducing salt intake, smoke cessation | Reduction SBP 1.9mmHg, reduction DBP 2.2 mmHg□vs control<br>Reduction in salt intake of 3.9g /day□ vs control                                                                                                                   |

|                              |                           |       |     |                                          |                                                 |            |                                     |                                                                                               |                                                                                         |                                                                                                                                                                 |
|------------------------------|---------------------------|-------|-----|------------------------------------------|-------------------------------------------------|------------|-------------------------------------|-----------------------------------------------------------------------------------------------|-----------------------------------------------------------------------------------------|-----------------------------------------------------------------------------------------------------------------------------------------------------------------|
| He et al, 2015 <sup>45</sup> | Changzhi (Northern China) | Urban | 279 | School children and their family members | 10 years (children) 43.8 years (family members) | 3.5 months | Cluster randomized controlled trial | Impact of education targeting school children on salt intake of them and their family members | Children receive education on the harmful effects of salt and how to reduce salt intake | Salt intake reduction of 1.9 g/day in children and 2.9 g/day in adults vs. control. The mean effect on SBP was -0.8 mm Hg in children and -2.3 mm Hg in adults. |
|------------------------------|---------------------------|-------|-----|------------------------------------------|-------------------------------------------------|------------|-------------------------------------|-----------------------------------------------------------------------------------------------|-----------------------------------------------------------------------------------------|-----------------------------------------------------------------------------------------------------------------------------------------------------------------|

Explanation results: normal letter type not significant □ p<0.05, □□ p<0.001, between brackets (to) are the confidence intervals if available

**KABP:** Knowledge, attitude, behavior, practice

**Salt Substitute:** 65% sodium chloride, 25% potassium chloride, and 10% magnesium sulphate, unless otherwise noted

**BP:** Blood pressure

**SBP:** Systolic Blood pressure

**DBP:** Diastolic Blood pressure

**HBP:** High blood pressure

**NHBP:** Non-high blood pressure

**HTN:** Hypertension/hypertensive population

**NHTN:** Normotensive/normotensive population

**PP:** Per protocol analysis

**ITC:** Intention to treat analysis

**24HRUP:** 24-hour urinary potassium

**24HRUS:** 24-hour urinary sodium

**OR:** Odds Ratio

Appendix D Search Strategy-Selection flowchart for salt reduction initiatives in China

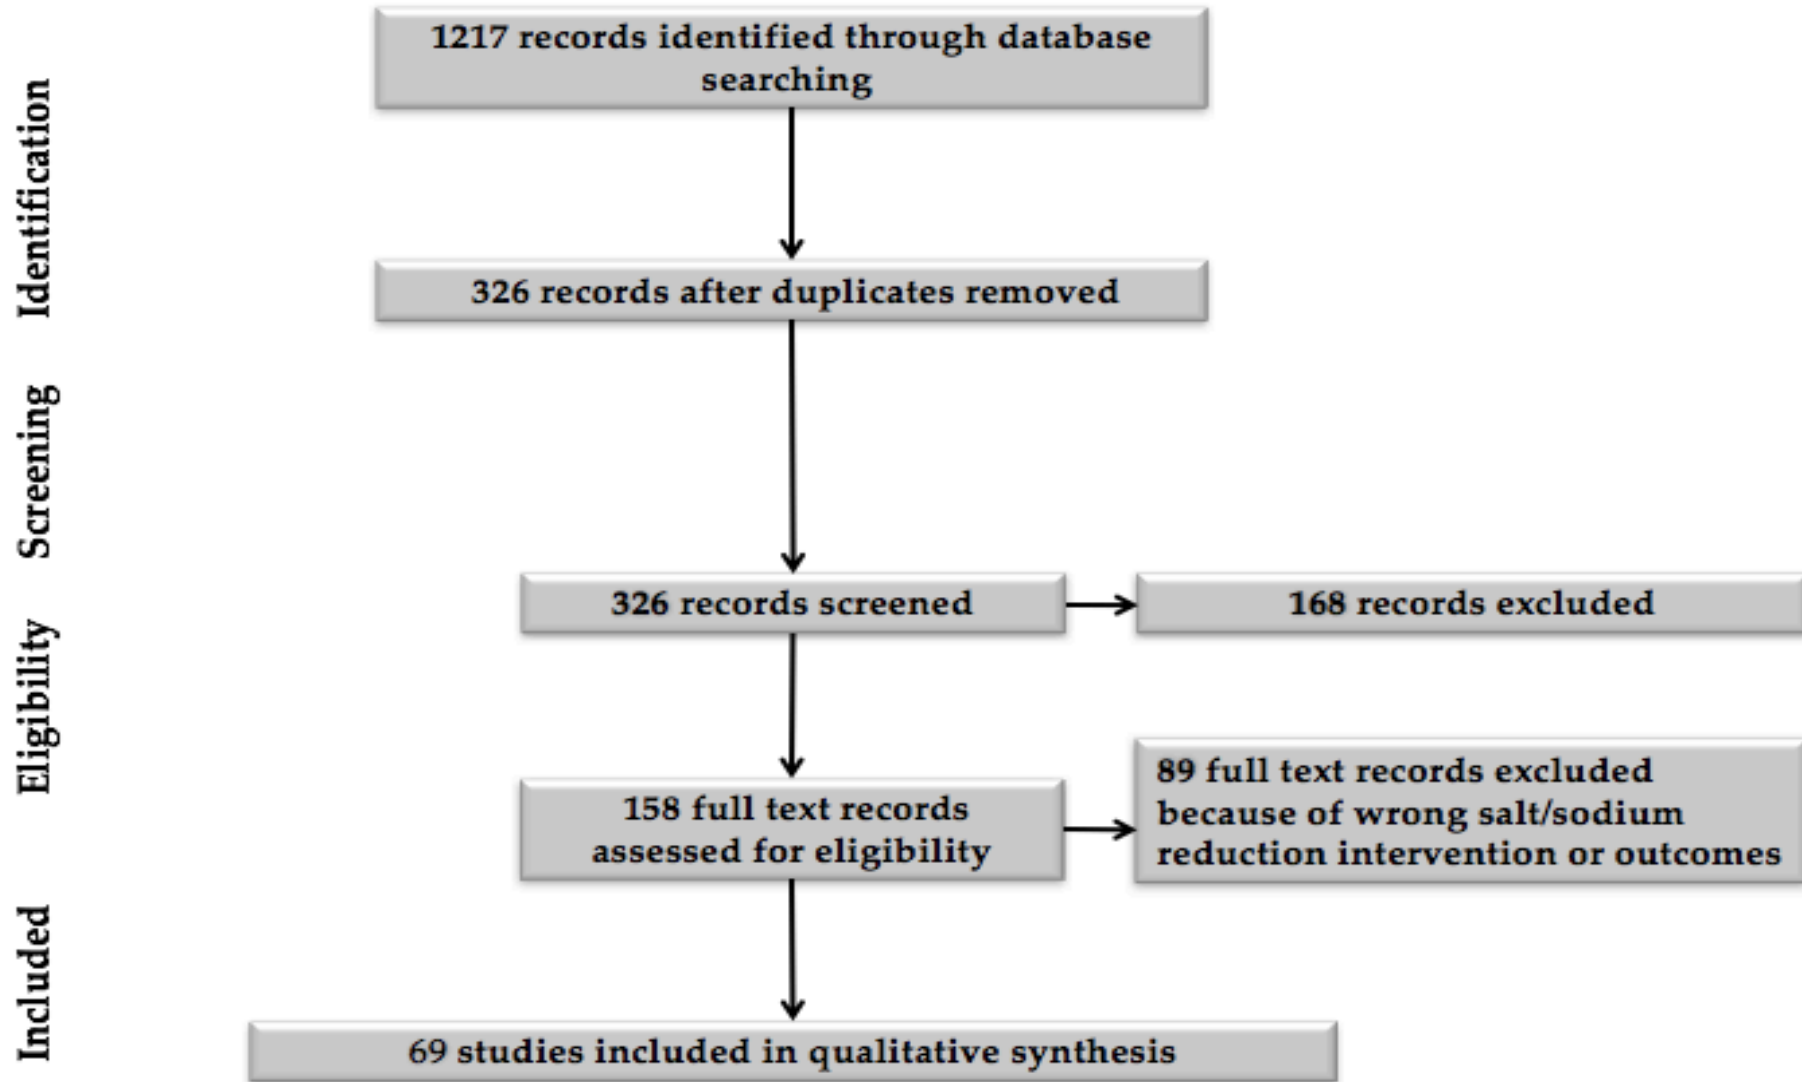

### Appendix E: A summary of salt-reduction related government regulations in China

| Document names (Chinese)          | Document names (English)                                                         | Responsible Entities                                                                               |
|-----------------------------------|----------------------------------------------------------------------------------|----------------------------------------------------------------------------------------------------|
| 中国慢性病防治工作规划 (2012 – 2015)         | National Plan of Prevention and Control of Chronic Diseases in China (2012-2015) | 15 Chinese ministries including the Ministry of Health, Ministry of Education, Ministry of Finance |
| 中国食物与营养发展纲要 (2014-2020)           | Chinese Diet and Nutritional Development Regulation (2014-2020)                  | State Council of China                                                                             |
| 中国减盐行动《2010-2020 行动计划》            | China World Action on Salt and Health (CWASH) (2010-2020)                        | China Centre of Disease Control, China George Institute of Chronic Disease Control                 |
| 预包装食品营养标签通则 (GB28050-2011)        | Nutritional Labelling in Prepacked Food Legislation (GB28050-2011)               | Ministry of Health                                                                                 |
| 低钠盐QB2019-2005 行业标准 (QB2019-2005) | Industry Standard of Low Sodium Salt (QB2019-2005)                               | National Development and Reform Commission                                                         |
| 绿色食品食用盐(NY/T 1040-2010)           | Green Food, Edible Salt Industry Regulation (NY/T 1040-2010)                     | Ministry of Agriculture                                                                            |

## References:

1. Hipgrave D, Chang S, Li X, Y W. Salt and Sodium Intake in China. *Jama*. 2016;315(7):703-705.
2. Ma G. The salt consumption of residents in China. *Chinese journal of prevention and control of chronic disease [Zhong Guo Man Xing Bing Yu Fang Yu Kong Zhi]*. 2008;16(4).
3. Liu A. Chinese adult' s dietary patterns and their relationship with hypertension among residents in nine provinces (1997-2009) [Phd]. *Chinese Centre for Disease Control and Prevention [Zhong Guo Ji Bing Yu Fang Kong Zhi Zhong Xin]*. 2011.
4. Liu L, Ikeda K, Yamori Y. Inverse relationship between urinary markers of animal protein intake and blood pressure in Chinese: results from the WHO Cardiovascular Diseases and Alimentary Comparison (CARDIAC) Study. *International journal of epidemiology*. 2002;31(1):227-233.
5. Liu L, Liu L, Ding Y, et al. Ethnic and environmental differences in various markers of dietary intake and blood pressure among chinese han and three other minority peoples of china: Results from the WHO cardiovascular diseases and alimentary comparison (CARDIAC) study. *Hypertension Research*. 2001;24(3):315-322.
6. Stamler J, Elliott P, Dennis B, et al. INTERMAP: background, aims, design, methods, and descriptive statistics (nondietary). *J Hum Hypertens*. 2003;17(9):591-608.
7. Li S, Wen J, Deng X. Status and change trend of food consumption and nutrients intake in urban population of Guangdong province. *Zhong Guo Gong Gong Wei Sheng [Chinese journal of public health]*. 2014;09:1109-1112.
8. Zhao F, Zhang P, Zhang L, et al. Consumption and sources of dietary salt in family members in Beijing. *Nutrients*. 2015;7(4):2719-2730.
9. Zhao Y, Yu Y, Jin Q. Cross-sectional study on dietary sodium and salt intake among urban residents above 18 years old in Beijing. *Chinese Journal of Health Education [Zhong Guo Jian Kang Jiao Yu]*. 2012;08:616-619+638.
10. Bi Z, Liang X, Xu A, et al. Hypertension prevalence, awareness, treatment, and control and sodium intake in Shandong Province, China: baseline results from Shandong-Ministry of Health Action on Salt Reduction and Hypertension (SMASH), 2011. *Prev Chronic Dis*. 2014;11:E88.
11. Zhang J, Yan L, Tang J, et al. Estimating daily salt intake based on 24 h urinary sodium excretion in adults aged 18-69 years in shandong, china. . *Bmj Open*. 2014;4(7):e005089-e005089.
12. Xu J, Wang M, Chen Y, et al. Estimation of salt intake by 24-hour urinary sodium excretion: A cross-sectional study in yantai, china. . *Bmc Public Health*. 2014;14(1):136-136.
13. Wang Q, Shao H. Study on dietary sodium intake and excretion among residents in Laicheng district of Laiwu city. *Journal of community medicine [She Qu Yi Xue Za Zhi]*. 2014;09:1-5.
14. Fan W. A survey on the sodium intake among college students. *Chinese Food and Nutrition [Zhong Guo Shi Wu Yu Ying Yang]*. 2014;20(1).
15. Yu L, Li N, You Y, et al. Analysis of self-reported daily salt intake and impact factor among Liaoning residents in 2014. *Preventive medicine in practice [Shi Yong Yu Fang Yi Xue]*. 2014;01:31-35.
16. Dong G, Sun Z, Zheng L, et al. Prevalence, awareness, treatment, and control of hypertension in rural adults from Liaoning Province, northeast China. *Hypertens Re*. 2007;30(10):951-958.
17. Yin L, Liu H, Liu J, Guan X. Dietary status and related influence factors of adults in Hunan province. *Practical preventive medicine [Shi Yong Yu Fang Yi Xue]*. 2015;01:94-96.

18. Fu Z, Liu J, Liu H, Jin D. Dietary patterns of urban residents from 1982 to 2012 in Hunan. *Journal of Central South University Medical sciences [Zhong nan da xue xue bao. Yi xue ban]*. 2014;39(7):713-717.
19. Zhang Y, Wang M, Shi J, Li P, Pei X, MH. D. Prevalence, awareness, treatment and control of hypertension and sodium intake in Jiangsu Province, China: a baseline study in 2014. *BMC Public Health*. 2016;16(1):56.
20. Qin Y, Li T, Lou P, et al. Salt intake, knowledge of salt intake, and blood pressure control in Chinese hypertensive patients. *J Am Soc Hypertens*. 2014;8(12):909-914.
21. Qin Y, Melse-Boonstra A, Pan X, et al. Association of dietary pattern and body weight with blood pressure in Jiangsu Province, China. *BMC Public Health*. 2014;14:948.
22. Chen J, Zhang R, Zhang H. Dietary intake and nutrition status of urban residents in Zhejiang province. *Chinese journal of public health [Zhong Guo Yu Fang Yi Xue Za Zhi]*. 2011;02:170-173.
23. Qi X, Wang Z, Jiang M, Cheng G. Investigation on salt intake of residents in Sanmen county. *Zhejiang journal of preventive medicine [Zhejiang Yu Fang Yi Xue ]*. 2015;03:281-282.
24. Hu M, Chen Z, Lin S, Lin X, Wang M, Wu J. Investigation and analysis on the salt intake of residents in Fujian province. *Chinese journal of control of endemic diseases [Zhong Guo Di Fang Bing Fang Zhi Za Zhi]*. 2010;06:435-437.
25. The China Salt Substitute Study Collaborative Group. Salt substitution: a low-cost strategy for blood pressure control among rural Chinese. A randomized, controlled trial. *Journal of Hypertension*. 2007;25(10):2011-2018.
26. Hu J, Jiang X, Li N, et al. Effects of salt substitute on pulse wave analysis among individuals at high cardiovascular risk in rural China: a randomized controlled trial. *Hypertens Res*. 2009;32(4):282-288.
27. Zhang GH, Ma JX, Guo XL, et al. [Field observation on the effect of low-sodium and high-potassium salt substitute on blood pressure in the rural community-based population in China]. *Chinese Journal of Epidemiology [Zhonghua liu xing bing xue za zhi]*. 2011;32(9):859-863.
28. Li N, Yan LL, Niu W, et al. A large-scale cluster randomized trial to determine the effects of community-based dietary sodium reduction--the China Rural Health Initiative Sodium Reduction Study. *Am Heart J*. 2013;166(5):815-822.
29. The George Institute for Global Health China. Study identifies a new community-based strategy to reduce population sodium intake in rural China. 2013; [http://www.georgeinstitute.org.cn/media-releases/study-identifies-a-new-community-based-strategy-to-reduce-population-sodium-intake-in?utm\\_source=George+Institute+External+Email+List&utm\\_campaign=0783bfc986-TGI\\_eNewsletter\\_RADAC&utm\\_medium=email&utm\\_term=0\\_0972953fbb-0783bfc986-95170073](http://www.georgeinstitute.org.cn/media-releases/study-identifies-a-new-community-based-strategy-to-reduce-population-sodium-intake-in?utm_source=George+Institute+External+Email+List&utm_campaign=0783bfc986-TGI_eNewsletter_RADAC&utm_medium=email&utm_term=0_0972953fbb-0783bfc986-95170073).
30. Zhou B, Wang HL, Wang WL, Wu XM, Fu LY, Shi JP. Long-term effects of salt substitution on blood pressure in a rural North Chinese population. *Journal of Human Hypertension*. 2013;27(7):427-433.
31. Zhao X, Yin X, Li X, Yan L, Lam C, Li S. Using a Low-Sodium, High-Potassium Salt Substitute to Reduce Blood Pressure among Tibetans with High Blood Pressure: A Patient-Blinded Randomized Controlled Trial. *PLoS ONE* 2014;9(10):e110131.
32. Jardine M, Li N, Ninomiya T, et al. Dietary sodium reduction reduced albuminuria in 1,903 rural chinese: A cluster randomised trial. *Nephrology*. 2014;19:28.
33. Zhou B, Webster J, Fu LY, et al. Intake of low sodium salt substitute for 3 years attenuates the increase in blood pressure in a rural population of North China - A randomized controlled trial. *International Journal of Cardiology*. 2016;215:377-382.
34. The George Institute. China Salt Substitute and Stroke Study (SSaSS). 2014; <https://clinicaltrials.gov/ct2/show/NCT02092090>. Accessed July, 2016.

35. Lai Y, Yue X, Wu Y. Study on the difference in taste between ordinary salt and a low-sodium, high-potassium salt substitute. *Circulation*. 2010;122(2):e353.
36. Chau PH, Ngai HHY, Leung AYM, Li SF, Yeung LOY, Tan-Un KC. Preference of food saltiness and willingness to consume low-sodium content food in a Chinese population. *Journal of Nutrition, Health and Aging*. 2016:1-8.
37. Li N, Prescott J, Wu Y, et al. The effects of a reduced-sodium, high-potassium salt substitute on food taste and acceptability in rural northern China. *British Journal of Nutrition*. 2009;101(07):1088-1093.
38. Mei KW, Wei MQ, Wang J. KABP investigation of residents on salt control in Minhang district of Shanghai and evaluation on the intervention effectiveness of dispatching salt-control spoons. *China Health Education Journal [Zhong Guo Jian Kang Jiao Yu]*. 2010;26(9):655-657.
39. Cai Z, Chen T. Effect assessment of salt reduction intervention among residents in Baoshan district, Shanghai. *Chinese Journal of Health Education [Zhong Guo Jian Kang Jiao Yu Qi Kan]*. 2011;27(8):571-573.
40. Yang S, Zhang X, He C, Chan J, Sun X. Analysis of the effect of salt reduction initiatives in Shunyi District, Beijing. *China J Prev Contr Chron Dis [Liu Xing Bing Xue Diao Cha]*. 2015;23(12).
41. Chen J, Tian Y, Liao Y, et al. Salt-restriction-spoon improved the salt intake among residents in China. *PLoS ONE*. 2013;8(11).
42. Wang Y, Shi Y, Wu C, et al. Evaluation on a Mass Campaign for Salt Control in Shanghai: Change in Salt Consumption. *J Environ Occup Med [Huan Jing Yu Zhi Ye Yi Xue]*. 2015;32(1):38-42.
43. Wang X, Li M, Ding J, et al. Evaluation on a Mass Campaign for Salt Control in Shanghai: Knowledge and Behavior Improvements on Restricted Salt Usage. *J Environ Occup Med [Huan Jing Yu Zhi Ye Yi Xue]*. 2015;32(1).
44. Chen J, Wu X, Gu D. Hypertension and cardiovascular diseases intervention in the capital steel and iron company and Beijing Fangshan community. *Obesity Review*. 2008;9.
45. He FJ, Wu Y, Feng XX, et al. School based education programme to reduce salt intake in children and their families (School-EduSalt): Cluster randomised controlled trial. *BMJ (Online)*. 2015;350.
